# Supplementary material
Source: PubMed Central journal article supplement (PMC10038205)
Supplement: mmc1.pdf [file mmc1.pdf]

**Cell, Volume 186**

**Supplemental information**

**A pseudovirus system enables deep mutational  
scanning of the full SARS-CoV-2 spike**

**Bernadeta Dadonaite, Katharine H.D. Crawford, Caelan E. Radford, Ariana G. Farrell, Timothy C. Yu, William W. Hannon, Panpan Zhou, Raiees Andrabi, Dennis R. Burton, Lihong Liu, David D. Ho, Helen Y. Chu, Richard A. Neher, and Jesse D. Bloom**

Supplementary table 1

| Name                                                                     | Sequence 5'-3'                                                                                                                                                                                                                                                                                                                                                | Function                                |                                           |
|--------------------------------------------------------------------------|---------------------------------------------------------------------------------------------------------------------------------------------------------------------------------------------------------------------------------------------------------------------------------------------------------------------------------------------------------------|-----------------------------------------|-------------------------------------------|
| <i>Mutagenesis primers</i>                                               |                                                                                                                                                                                                                                                                                                                                                               |                                         |                                           |
| BA.1 oPools                                                              | <a href="https://github.com/dms-vep/SARS-CoV-2_Omicron_BA.1_spike_DMS_mAbs/tree/main/library_design">https://github.com/dms-vep/SARS-CoV-2_Omicron_BA.1_spike_DMS_mAbs/tree/main/library_design</a>                                                                                                                                                           | Primers to add mutations to BA.1 spike  |                                           |
| Delta oPools                                                             | <a href="https://github.com/dms-vep/SARS-CoV-2_Delta_spike_DMS_REGN10933/tree/main/library_design/results">https://github.com/dms-vep/SARS-CoV-2_Delta_spike_DMS_REGN10933/tree/main/library_design/results</a>                                                                                                                                               | Primers to add mutations to Delta spike |                                           |
| <i>Spike amplification and joining PCR</i>                               |                                                                                                                                                                                                                                                                                                                                                               |                                         |                                           |
| VEP_amp_for                                                              | CAGCCGAGCCACATCGCTC                                                                                                                                                                                                                                                                                                                                           | For amplifying spike with flanking      |                                           |
| 3'rev_lib_LinJoin_KHDC                                                   | CGGAAGAGCGTCGTGTAGGGAAAG                                                                                                                                                                                                                                                                                                                                      | sequences from lentivirus backbone      |                                           |
| <i>Spike barcoding primers</i>                                           |                                                                                                                                                                                                                                                                                                                                                               |                                         |                                           |
| ForInd_AddBC_2                                                           | gcggaactccactaggaacatttctctctcgaaTCTAGANNNNNNNNNNNNNNAGATCGGAAGAGCGTCGTGTAGGGAAAGAG                                                                                                                                                                                                                                                                           | For adding barcodes to spike gene       |                                           |
| 5'for_lib_bcing                                                          | gcacgcgCAGCCGAGCCACATCGCTCA                                                                                                                                                                                                                                                                                                                                   |                                         |                                           |
| <i>Neutralization standard barcoding primers</i>                         |                                                                                                                                                                                                                                                                                                                                                               |                                         |                                           |
| 5'for_lib_bcing                                                          | gcacgcgCAGCCGAGCCACATCGCTCA                                                                                                                                                                                                                                                                                                                                   | For barcoding neutralization standard   |                                           |
| Barcoding primer pool 1:<br>VSVG_BC1<br>VSVG_BC2<br>VSVG_BC3<br>VSVG_BC4 | gcggaactccactaggaacatttctctctcgaaTCTAGAtactttactactgcacAGATCGGAAGAGCGTCGTGTAGGGAAAGAG<br>gcggaactccactaggaacatttctctctcgaaTCTAGAggaccattgacgagtaAGATCGGAAGAGCGTCGTGTAGGGAAAGAG<br>gcggaactccactaggaacatttctctctcgaaTCTAGAcctagccactagatggAGATCGGAAGAGCGTCGTGTAGGGAAAGAG<br>gcggaactccactaggaacatttctctctcgaaTCTAGAatggaggagtactAGATCGGAAGAGCGTCGTGTAGGGAAAGAG |                                         |                                           |
| Barcoding primer pool 2<br>VSVG_BC5<br>VSVG_BC6<br>VSVG_BC7<br>VSVG_BC8  | gcggaactccactaggaacatttctctctcgaaTCTAGAtagttaaacgccagAGATCGGAAGAGCGTCGTGTAGGGAAAGAG<br>gcggaactccactaggaacatttctctctcgaaTCTAGAccaacgcgtgaatcgcAGATCGGAAGAGCGTCGTGTAGGGAAAGAG<br>gcggaactccactaggaacatttctctctcgaaTCTAGAatcgtatccatggtaAGATCGGAAGAGCGTCGTGTAGGGAAAGAG<br>gcggaactccactaggaacatttctctctcgaaTCTAGAggtcacgtgtctatatAGATCGGAAGAGCGTCGTGTAGGGAAAGAG |                                         |                                           |
| <i>Spike gene amplification for PacBio long-read sequencing</i>          |                                                                                                                                                                                                                                                                                                                                                               |                                         |                                           |
| PacBio_5pri_C_tag1                                                       | ctagccattcagagGCAGCCGAGCCACcTCGCTC                                                                                                                                                                                                                                                                                                                            |                                         | Used for amplifying spike and barcode for |
| PacBio_3pri_G_tag1                                                       | CGCTCAACCAGTACGAGCCGTAAGTTATGTAACGCGGAAGTCCACgAGGAAC                                                                                                                                                                                                                                                                                                          |                                         |                                           |

|                                                                |                                                                   |                                                                                          |
|----------------------------------------------------------------|-------------------------------------------------------------------|------------------------------------------------------------------------------------------|
| PacBio_5pri_G_tag2                                             | ctagccattcagagGCAGCCGAGCCACgTCGCTC                                | PacBio sequencing                                                                        |
| PacBio_3pri_C_tag2                                             | CGCTCAACCAGTACGAGCCGTAAGTTATGTAACGCGGAACTCCACcAGGAAC              |                                                                                          |
| PacBio_5pri_RND2                                               | CTAGCCATTcAGAGGCAGCCGAG                                           |                                                                                          |
| PacBio_3pri_RND2                                               | CGCTCAACCAGTACGAGCCGTAAGTTATGTAAC                                 |                                                                                          |
| <i>Illumina barcode sequencing 1st round PCR primers</i>       |                                                                   |                                                                                          |
| IlluminaRnd1_For                                               | CTCTTCCCTACACGACGCTCTTCCGATCT                                     | Round 1 primers for barcode sequencing                                                   |
| IlluminaRnd1_Rev3                                              | CTGGAGTTCAGACGTGTGCTCTTCCGATCTgtccctattggcgttactatgggaacatacgtc   |                                                                                          |
| <i>Illumina barcode sequencing library round 2 PCR primers</i> |                                                                   |                                                                                          |
| Rnd2ForUniversal                                               | AATGATACGGCGACCACCGAGATCTACACTCTTCCCTACACGACGCTCTTCCGATCT         | Universal illumina primer and indexing primer, where xxxxxxx indicates i7 index sequence |
| Indexing primer                                                | CAAGCAGAAGACGGCATAcGAGATxxxxxxxGTGACTGGAGTTCAGACGTGTGCTCTTCCGATCT |                                                                                          |
